# Supplementary material for: Synergistic Interaction of HOXB13 and CIP2A Predisposes to Aggressive Prostate Cancer
Source: Oxford University Press journal article supplement (doi:10.1158/1078-0432.ccr-18-0444), 2018-09-04
Supplement: 10780432ccr180444-sup-196736_3_supp_4930547_pcqljx.docx [file 10780432ccr180444-sup-196736_3_supp_4930547_pcqljx.docx]

***SUPPLEMENTARY MATERIAL***

**The PRACTICAL Consortium (http://practical.icr.ac.uk/):**

**OncoArray European and Asian samples**

Rosalind A. Eeles1,2, Brian E. Henderson3*, Christopher A. Haiman3, ZSofia Kote-Jarai1, Fredrick R. Schumacher4,5, Ali Amin Al Olama6,7, Sara Benlloch6,1, Kenneth Muir8,9, Sonja I. Berndt10, David V. Conti3, Fredrik Wiklund11, Stephen Chanock10, Susan Gapster12, Victoria L. Stevens12, Catherine M. Tangen13, Jyotsna Batra14,15, Judith Clements14,15, Australian Prostate Cancer Research Centre BioResource (APCB)14, Henrik Gronberg11, Nora Pashayan16,17, Johanna Schleutker18,19, Demetrius Albanes10, Alicja Wolk20, Catharine West21, Lorelei Mucci22, Géraldine Cancel-Tassin23,24, Stella Koutros10, Karina Dalsgaard Sorensen25,26, Lovise Maehle27, David E. Neal28,29,30, Freddie C. Hamdy30, Jenny L. Donovan31, Ruth C. Travis32, Robert J. Hamilton33, Sue Ann Ingles3, Barry S. Rosenstein34,35, Yong-Jie Lu36, Graham G. Giles37,38, Adam S. Kibel39, Ana Vega40, Manolis Kogevinas41,42,43,44, Kathryn L. Penney45, Jong Y. Park46, Janet L. Stanford47,48, Cezary Cybulski49, Børge G. Nordestgaard50,51, Hermann Brenner52,53,54, Christiane Maier55, Jeri Kim56, Esther M. John57,58, Manuel R. Teixeira59,60, Susan L. Neuhausen61, Kim De Ruyck62, Azad Razack63, Lisa F. Newcomb47,64, Davor Lessel65, Radka Kaneva66, Nawaid Usmani67,68, Frank Claessens69, Paul A. Townsend70, Manuela Gago Dominguez71,72, Monique J. Roobol73, Florence Menegaux74, Kay-Tee Khaw75, Lisa Cannon-Albright76,77, Hardev Pandha78, Stephen N. Thibodeau79

*In memorium

1 The Institute of Cancer Research, London, UK.

2 Royal Marsden NHS Foundation Trust, London, UK.

3 Department of Preventive Medicine, Keck School of Medicine, University of Southern California/Norris Comprehensive Cancer Center, Los Angeles, CA, USA.

4 Department of Epidemiology and Biostatistics, Case Western Reserve University, Cleveland, OH, USA.

5 Seidman Cancer Center, University Hospitals, Cleveland, OH, USA.

6 Centre for Cancer Genetic Epidemiology, Department of Public Health and Primary Care, University of Cambridge, Strangeways Research Laboratory, Cambridge, UK.

7 University of Cambridge, Department of Clinical Neurosciences, Cambridge, UK.

8 Division of Population Health, Health Services Research and Primary Care, University of Manchester, Manchester, UK.

9 Warwick Medical School, University of Warwick, Coventry, UK.

10 Division of Cancer Epidemiology and Genetics, National Cancer Institute, NIH, Bethesda, MD, USA.

11 Department of Medical Epidemiology and Biostatistics, Karolinska Institute, Stockholm, Sweden.

12 Epidemiology Research Program, American Cancer Society, 250 Williams Street, Atlanta, GA, USA.

13 SWOG Statistical Center, Fred Hutchinson Cancer Research Center, Seattle, WA, USA.

14 Australian Prostate Cancer Research Centre-Qld, Institute of Health and Biomedical Innovation and School of Biomedical Science, Queensland University of Technology, Brisbane, Queensland, Australia.

15 Translational Research Institute, Brisbane, Queensland, Australia.

16 University College London, Department of Applied Health Research, London, UK.

17 Centre for Cancer Genetic Epidemiology, Department of Oncology, University of Cambridge, Strangeways Laboratory, Cambridge, UK.

18 Department of Medical Biochemistry and Genetics, Institute of Biomedicine, University of Turku, Finland.

19 Tyks Microbiology and Genetics, Department of Medical Genetics, Turku University Hospital, Finland.

20 Division of Nutritional Epidemiology, Institute of Environmental Medicine, Karolinska Institutet, Sweden.

21 Division of Cancer Sciences, University of Manchester, Manchester Academic Health Science Centre, Radiotherapy Related Research, Manchester NIHR Biomedical Research Centre, The Christie Hospital NHS Foundation Trust, Manchester, UK.

22 Department of Epidemiology, Harvard T.H Chan School of Public Health, Boston, MA, USA.

23 CeRePP, Tenon Hospital, Paris, France.

24 UPMC Sorbonne Universites, GRC N°5 ONCOTYPE-URO, Tenon Hospital, Paris, France.

25 Department of Molecular Medicine, Aarhus University Hospital, Denmark.

26 Department of Clinical Medicine, Aarhus University, Denmark.

27 Department of Medical Genetics, Oslo University Hospital, Norway.

28 University of Cambridge, Department of Oncology, Addenbrooke's Hospital, Cambridge, UK.

29 Cancer Research UK Cambridge Research Institute, Li Ka Shing Centre, Cambridge, UK.

30 Nuffield Department of Surgical Sciences, University of Oxford, Oxford, UK, Faculty of Medical Science, University of Oxford, John Radcliffe Hospital, Oxford, UK.

31 School of Social and Community Medicine, University of Bristol, Bristol, UK.

32 Cancer Epidemiology Unit, Nuffield Department of Population Health University of Oxford, Oxford, UK.

33 Dept. of Surgical Oncology, Princess Margaret Cancer Centre, Toronto, Canada.

34 Department of Radiation Oncology, Icahn School of Medicine at Mount Sinai, New York, NY, USA.

35 Department of Genetics and Genomic Sciences, Icahn School of Medicine at Mount Sinai, New York, NY, USA.

36 Centre for Molecular Oncology, Barts Cancer Institute, Queen Mary University of London, John Vane Science Centre, London, UK.

37 Cancer Epidemiology & Intelligence Division, The Cancer Council Victoria, Melbourne, Victoria, Australia.

38 Centre for Epidemiology and Biostatistics, Melbourne School of Population and Global Health, The University of Melbourne, Melbourne, Australia.

39 Division of Urologic Surgery, Brigham and Womens Hospital, Boston, MA, USA.

40 Fundación Pública Galega de Medicina Xenómica-SERGAS, Grupo de Medicina Xenómica, CIBERER, IDIS, Santiago de Compostela, Spain.

41 Centre for Research in Environmental Epidemiology (CREAL), Barcelona Institute for Global Health (ISGlobal), Barcelona, Spain.

42 CIBER Epidemiología y Salud Pública (CIBERESP), Madrid, Spain.

43 IMIM (Hospital del Mar Research Institute), Barcelona, Spain.

44 Universitat Pompeu Fabra (UPF), Barcelona, Spain.

45 Channing Division of Network Medicine, Department of Medicine, Brigham and Women's Hospital/Harvard Medical School, Boston, MA, USA.

46 Department of Cancer Epidemiology, Moffitt Cancer Center, Tampa, USA.

47 Division of Public Health Sciences, Fred Hutchinson Cancer Research Center, Seattle, Washington, USA.

48 Department of Epidemiology, School of Public Health, University of Washington, Seattle, Washington, USA.

49 International Hereditary Cancer Center, Department of Genetics and Pathology, Pomeranian Medical University, Szczecin, Poland.

50 Faculty of Health and Medical Sciences, University of Copenhagen, Denmark.

51 Department of Clinical Biochemistry, Herlev and Gentofte Hospital, Copenhagen University Hospital, Herlev, Denmark.

52 Division of Clinical Epidemiology and Aging Research, German Cancer Research Center (DKFZ), Heidelberg, Germany.

53 German Cancer Consortium (DKTK), German Cancer Research Center (DKFZ), Heidelberg, Germany.

54 Division of Preventive Oncology, German Cancer Research Center (DKFZ) and National Center for Tumor Diseases (NCT), Heidelberg, Germany.

55 Institute for Human Genetics, University Hospital Ulm, Ulm, Germany.

56 The University of Texas MD Anderson Cancer Center, Department of Genitourinary Medical Oncology, Houston, TX, USA.

57 Cancer Prevention Institute of California, Fremont, CA, USA.

58 Department of Health Research & Policy (Epidemiology) and Stanford Cancer Institute, Stanford University School of Medicine, Stanford, CA , USA.

59 Department of Genetics, Portuguese Oncology Institute of Porto, Porto, Portugal.

60 Biomedical Sciences Institute (ICBAS), University of Porto, Porto, Portugal.

61 Department of Population Sciences, Beckman Research Institute of the City of Hope, Duarte, CA, USA.

62 Ghent University, Faculty of Medicine and Health Sciences, Basic Medical Sciences, Gent, Belgium.

63 Department of Surgery, Faculty of Medicine, University of Malaya, Kuala Lumpur, Malaysia.

64 Department of Urology, University of Washington, Seattle, WA, USA.

65 Institute of Human Genetics, University Medical Center Hamburg-Eppendorf, Hamburg, Germany.

66 Molecular Medicine Center, Department of Medical Chemistry and Biochemistry, Medical University, Sofia, Bulgaria.

67 Department of Oncology, Cross Cancer Institute, University of Alberta, Edmonton, Alberta, Canada.

68 Division of Radiation Oncology, Cross Cancer Institute, Edmonton, Alberta, Canada.

69 Molecular Endocrinology Laboratory, Department of Cellular and Molecular Medicine, KU Leuven, Leuven, Belgium.

70 Institute of Cancer Sciences, Manchester Cancer Research Centre, University of Manchester, Manchester Academic Health Science Centre, St Mary's Hospital, Manchester, UK.

71 Genomic Medicine Group, Galician Foundation of Genomic Medicine, Instituto de Investigacion Sanitaria de Santiago de Compostela (IDIS), Complejo Hospitalario Universitario de Santiago, Servicio Galego de Saúde, SERGAS, Santiago De Compostela, Spain.

72 University of California San Diego, Moores Cancer Center, La Jolla, CA, USA.

73 Department of Urology, Erasmus University Medical Center, Rotterdam, the Netherlands.

74 Cancer & Environment Group, Center for Research in Epidemiology and Population Health (CESP), INSERM, University Paris-Sud, University Paris-Saclay, Villejuif, France.

75 Clinical Gerontology Unit, University of Cambridge, Cambridge, UK.

76 Division of Genetic Epidemiology, Department of Medicine, University of Utah School of Medicine, Salt Lake City, Utah, USA.

77 George E. Wahlen Department of Veterans Affairs Medical Center, Salt Lake City, UT, USA.

78 The University of Surrey, Guildford, Surrey, UK.

79 Department of Laboratory Medicine and Pathology, Mayo Clinic, Rochester, MN, USA.

**SUPPLEMENTARY METHOD**

***Clinical and pathological sub-classification of PrCa patients***

Clinically detected PrCa cases (83.3%) dominated our sample set compared to relatively small number of screen-detected patients (16.7%). Notably, 27.4% of all cases developed either PSA progression, local or distant progression; and 287 patients (10.5%) emerged castration resistance after androgen deprivation therapy. From 1126 deceased PrCa patients 26.4% died of PrCa, which is 10.9% of the whole PrCa population studied. In addition, germline DNA was available from altogether 590 clinically and pathologically defined BPH from the Urology Outpatient Clinic in Tampere University Hospital (Tampere, Finland). From these, 198 (33.6 % of BPH patients) developed PrCa later in life (7.23% of all PrCa cases).

Combined modality staging according to ERSPC classification has been applied to comprehensively characterize biochemical progression of PrCa. It offers a method of identifying risk-stratifying factors for patients with PrCa. Patients were categorized to risk groups according to their PSA level, TNM staging and Gleason score (**Supplementary Table 2***.*) from the medical records. One third of the PrCa cases (32.7%) belong to the least severe tumour stage group (TSG1). Elevating PSA level and Gleason-score assigned 24.3% of the cases to TSG2 and 23.4% belong to TSG3 group. Of the patients, 10.2% belong to the highest risk group, where cancer has been spread to the regional lymph nodes and distant metastasis has been detected (TSG4 group). TSG5 group comprise of patients with unknown pathological stages (9.40%).

***SNP genotyping and sequencing***

Germline blood DNA was genotyped for *HOXB13* G84E (rs138213197) using a Custom TaqMan SNP assay (Applied Biosystems/Life Technologies) and for *CIP2A* R229Q (rs2278911) using **custom Illumina iSelect SNP genotyping array platform**, designed as part of the Collaborative Oncological Gene-Environment Study (COGS), according to the manufacturer’s instructions. BPH samples for *HOXB13* G84E were genotyped by the Technology Centre, Institute for Molecular Medicine Finland (FIMM), University of Helsinki (Helsinki, Finland) using the MassARRAY iPLEX platform (Sequenom, Inc.). Duplicate test samples and four negative controls were included in each 384-well plate. Concordance for the control samples was >99%. In a selected set of PrCa samples, the studied variants were confirmed through standard Sanger sequencing using ABI PRISM BigDye Termination Cycle Sequencing Ready Reaction Kit (Applied Biosystems/Life Technologies).

The pathogenicity prediction of G84E and R229Q variants was investigated by using an in silico tool for missense variants, named Combined Annotation Dependent Depletion (CADD) prediction software (1). This enables the objective integration of many diverse annotations into a single measure (C-score) for each variant. This software integrates altogether ~63 different tools, applying conservation matrices as well as protein based matrices. A variant is predicted to be pathogenic if the scaled C-score calculated by the software is above 10, which indicates the top 10% deleterious state among possible substitutions. For comparison the Human Genome version 37p13 (hg19) was used. Integrated single, quantitative C-score correlates with annotations of functionality, pathogenicity, disease severity, experimentally measured regulatory effects, allelic diversity, and complex trait associations, and highly rank known pathogenic variants within individual genomes. In addition, we applied M-CAP classifier for *HOXB13* G84E rare missense variant, which combines previous pathogenicity scores (including SIFT, Polyphen-2 and CADD) with novel features and a powerful model, and aims to attain the best classifier at all thresholds.

***Plasmids and site-directed mutagenesis***

The pcDNA™ 3.1/V5 vector (Invitrogen) was used for ectopic overexpression of HOXB13, HOXB13 G84E, CIP2A and CIP2A R229Q. Primers HOXB13-KpnI-F: GTGGTACCATGGAGCCCGGCAATTATG and HOXB13-XbaI-R: GTGTCTAGAAGGGGTAGCGCTGTTCTTC were designed to clone HOXB13 full-length cDNA into the pcDNA™ 3.1/V5 expression vector, and CIP2A-KpnI-F: GGGGTACCATGGACTCCACTGCCT and CIP2A-XhoI-R: CCGCTCGAGTATACTGAGATTCACAGTTTCTG were similarly used to clone CIP2A full-length cDNA. Single nucleotide mutagenesis was performed according to the instructions provided with the QuikChange™ Site-Directed Mutagenesis Kit. The primers used for site-directed mutagenesis were HOXB13-G84E-F: ccttatggttactttgAaggcgggtactactcctg, HOXB13-G84E-R: caggagtagtacccgcctTcaaagtaaccataagg, CIP2A R229Q-F: ggaaaagctattccatgctcAaaacattcatcagacttttc and CIP2A R229Q-R: gaaaagtctgatgaatgtttTgagcatggaatagcttttcc.

***Cell culture***

The PrCa cell lines VCaP, LNCaP, and 22Rv1 were ordered from ATCC. VCaP was grown in high glucose DMEM (31966021, Invitrogen), LNCaP and 22Rv1 were grown in RPMI1640 (R8758, Sigma). The DMEM, and RPIM1640 media were supplied with 10% FBS and antibiotics (penicillin and streptomycin, Sigma).

***Western blot analysis***

Cells were washed twice with 1×PBS and resuspended in lysis buffer (600 mM NaCl, 1% Triton X-100 in PBS, 1× protease inhibitor). The samples were denatured in 1×SDS loading buffer (Thermo Scientific). For each sample, 30 µg of total protein was loaded onto 10% SDS-PAGE gel. The proteins were separated in the gel and then transferred to 0.45-µm PVDF transfer membrane (Immobilon-P Millipore) with a Semi-Dry transfer cell (Trans-Blot SD, Bio-Rad). Membranes were blocked for 1 h at room temperature using blocking buffer (5% non-fat milk in TBST) and incubated with an antibody against the V5 Tag (460705, Invitrogen) or β-actin (sc-1616-R, Santa Cruz) overnight at 4 °C. After washing three times with TBST for 5 min, the membranes were incubated with HRP-conjugated secondary antibody (32460 or 32430, Invitrogen) for 1 h. Then, the membranes were washed tree times and then developed with SuperSigna West Femto Maximum Sensitivity Substrate (34094, Thermo Fisher Scientific).

***Cell viability and proliferation assays***

The constructs were transfected into 22Rv1 cells with Lipofectamine™ 3000 Transfection Reagent (L3000008, Thermo Fisher) following the manufacturer’s instructions. After 24 h, the cells were detached and seeded onto 96-well cell culture plates (2×103 per well). We used XTT reagent (11465015001, Roche) to determine cell viability and proliferation and collected data every two days at the same time point by measuring the absorbance at 450 nm according to manufacturer's instructions. We performed two-tailed t tests to determine statistical significance.

***Wound healing assays***

Cells were seeded onto IncuCyte® 96-Well ImageLock Plates. The wounds were created using WoundMakerTM when the cells grew near confluence. Then, the cells were washed twice with 1×PBS, and 100 µl of medium was added to each well. We placed the assay plate into IncuCyte ZooM and scanned the wound areas by using ZOOM software. Photographs of the wounded area in each well at different time points were collected and analysed using ImageJ. Two-tailed t tests were performed to determine statistical significance.

***Chromatin immunoprecipitation followed by quantitative PCR***

ChIP assays were performed according to the protocol as described previously (2). In brief, prostate cancer VCaP, LNCaP or 22Rv1 cells were chemically cross-linked using 1% formaldehyde at room temperature for 10 min. The reaction was stopped with 125 mM glycine. Cells were collected, washed, lysed, and sonicated to fragment the chromatin into an average size of 0.5 kb on a Q800R sonicator (QSonica). Chromatin lysate was subjected to immunoprecipitation with antibody against HOXB13 (sc-66923x, Santa Cruz Biotechnology). The immunoprecipitated DNA was purified and analysed by quantitative PCR (Stratagene) with primers that targeted two genomic regions defined by ChIP-seq shown in Figure 3. The primers used are CIP2A-HBS140f: TTTGGAGACAAACTCTCCCCAGC, and CIP2A-HBS140r: ACCACCACCATAGTCAGGGTTTTG; CIP2A-HBS173f: AGCAATAAACAAGTTCCCCCAGAGT, and CIP2A-HBS173r, ACCAATTTGTGTGCCTACTAGCAA.

***Lentivirus production and infection, and shRNA-, and siRNA-mediated knockdown of HOXB13***

Five shRNAs against *HOXB13* and one control shRNA (SHC002) were purchased from Functional Genomics Unit at University of Helsinki. We selected two most efficient shRNAs (TRCN0000020845 and TRCN0000020846) from these five shRNAs against *HOXB13*. Lentivirus was packaged in 239T cells using the third generation method. Briefly, the 239T cells were seeded 24h before transfection. 1.5ug plasmid of the target shRNA construct, 0.5ug of pVSVG, 0.5ug of pMDLg/pRRE and 0.5ug of pRSV-Rev were co-transfected according to the protocol for Lipofectamine 2000. The medium was changed for 2ml fresh medium in 24h. Virus was collected every 24h up to 3 times. 22Rv1 cells with 50-60% confluency were infected with 500ul of the virus-containing supernatant together with 1.5ml growth medium and 8ug/ml polybrene in a 6-well plate. After 24h incubation, virus-containing medium was replaced by normal growth medium containing 1ug/ml puromycin (Sigma). After 48h, the cells were collected for RNA extraction.

For siRNAs against HOXB13, the individual set of four siRNAs (Qiagen) against HOXB13 was tested, and the two most effective single siRNAs (SI04154626 and SI04133304, Qiagen) against HOXB13 were selected for siRNA-mediated knockdown of *HOXB13* in given prostate cancer cell lines as previously described (2).

***RNA extraction and quantitative real time PCR***

The RNeasy Mini Kit (74106, Qiagen) was used to isolate RNA from collected 22Rv1 cells. The reverse Transcription Kit (4368814, Applied Biosystems) was used to synthesize cDNA from 2ug RNA. The primer sequences used in quantitative RT-PCR reactions can be found in **Supplementary Table 4**. SYBR Select Master Mix (4472908, Applied Biosystems) was applied in this experiment with three replicates for each genes. The mRNA level of the gene was normalized to an endogenous control *ACTB* gene.

**RNA-Seq and data analysis**

Three days after the 22Rv1 cells were transfected with the indicated plasmids, we isolated the total RNA from cells using the RNeasy Mini Kit (74106, Qiagen). The quality and quantity of total RNA was assessed using Agilent Bioanalyser 2100 (Agilent Technologies), the Eukaryote Total RNA Nano Kit (Agilent), and the Qubit RNA Broad Range kit (Life Technologies). The RNA integrity number of the samples ranged from 9,8 to 10. Five nanograms of total RNA was used for library preparation using Illumina’s TruSeq® Stranded Total RNA LT (w/ Ribo-Zero™ Human/Mouse/Rat) library preparation kit following the manufacturer’s instructions. Quantification and quality assessment of libraries were performed using an Agilent Bioanalyser 2100, DNA 1000 Kit (Agilent), Qubit Broad Range DNA kit (Life Technologies) and qPCR KAPA Library quantification kit (Kapa Biosystems). The libraries were sequenced using an Illumina NextSeq550 platform in high-output, single-ended, 76 cycle mode, followed by FASTQ generation within BaseSpace (Illumina). FASTQC and Cutadapt were used for pre-analysis quality control. Tophat2 (3) was used to align the reads to the human reference genome (GRCh37/hg19), and HTSeq (4) was used for read counting. DESeq2 (5) was used to identify those genes that were differentially expressed between HOXB13/CIP2A-expressing and HOXB13 G84E/CIP2A R229Q-expressiong 22Rv1 cells.

**SUPPLEMENTARY RESULT**

***Dissection of the effect of HOXB13 G84E and CIP2A R229Q variants on prostate cancer risk***

To evaluate the effects of *HOXB13* and *CIP2A* variants on PrCa risk we tested three selection methods (enter, forward and backward) of binary stepwise logistic-regression. The usually preferred backward elimination method gave the most significant result. In this procedure we started with all candidate variants, and tested if the deletion of the variant improves the model the best by being deleted, and repeating this process until no further improvement is possible. All of the genetic variants, *HOXB13* T carrier, *CIP2A* T carrier and dual minor allele carrier status (TT), were included in the initial model and a backward stepwise regression selection procedure was used, with an exit *p*-value of 0.05, to create the final model. Removing *HOXB13* T carriers deteriorated the model the most, the change in -2 log likelihood was 76.365 points, the significance of the change was p=1.3681E-28. Additionally, removing dual T carriers deteriorates the model as well, but with lower effect (change in -2 Log Likelihood is 4.330 points, P=0.037).

When using all the predictor genetic variants as a group (ENTER method) the Nagelkerke R Square test revealed that 3.3% of the variability in PrCa risk can be accounted for by all the used predictors together in the Finnish patients. With this method the *HOXB13* T carriers showed a significant risk for PrCa (OR 6.268; 95% CI, 3.804-10.327; p=5.8567E-13); but none of other tested variables did.

In this way, the regression analysis confirmed that the *HOXB13* variant has the main effect in PrCa development of all the variants used in the model.

***Time to disease development defined by dual carriers of HOXB13 G84E and CIP2A R229Q variants***

Time to event analyses (carriers vs. non-carriers) confirmed the above-described significant risk for earlier PrCa development in *HOXB13 T* allele carriers (HR 1.9; 95% CI 1.6-2.2; p=6.07E-16) (**Supplementary Table 6**); age at diagnosis 68.1 vs. 67.8 years, respectively. No association was found between *CIP2A* T carriers and time to PrCa diagnosis. Synergistic effect of dual carriers of *HOXB13* T and *CIP2A* T alleles was shown not only in susceptibility, but also in 7.2 months earlier diagnosis of the disease (HR 2.1; 95% CI 1.6-2.8; p=4.52E-7).

***Risk of castration resistant and other types of prostate cancer conferred by dual T carriers of HOXB13 and CIP2A variants***

Association analyses results of *HOXB13* G84E, *CIP2A* R229Q carrier status and the risk of specific PrCa subgroupsare shown in **Supplementary Table 7**. *HOXB13* mutation showed substantial association with clinically detected PrCa cases (OR 8.6; 95% CI 5.4-13.8; p=3.1x10-19) vs. controls, and was also associated with screen-detected PrCa vs. controls (OR 5.2; 95% CI 2.8-9.9; p=3.4x10-7). The association of *HOXB13* T allele with PrCa cases showing clinical symptoms of disease is remarkably supported by OR 1.6 when clinically detected vs. screen detected PrCa cases were compared (95% CI 1.0- 2.7; p=0.046). Although BPH is not considered a premalignant lesion, our study showed that G84E variant confers for a 12.6-fold risk of developing PrCa in BPH diagnosed men compared to BPH controls (95% CI 2.8-56.8; p=0.001). *CIP2A* T allele showed no association with any of the PrCa subgroups analysed (data not shown).

Dual T carriers of *HOXB13* and *CIP2A* had a dramatically high risk of clinically detected PrCa vs. controls (OR, 23.4; 95% CI 5.7-96.8; p=0.000013), and also significantly increased risk of screen-detected PrCa vs. controls (OR 10.7; 95% CI 2.0- 58.8; p=0.006). Even though the association of dual T carriers and PrCa development in BPH diagnosed men could not be statistically evaluated because of the small sample size, it is noteworthy to mention that out of 590 BPH samples, two were dual T carriers and they both have been diagnosed later with PrCa. It was especially important to evaluate the risk of studied variants on development of castration resistance during the treatment.

We found that patients treated with prostatectomy had higher mutation carrier rate for *HOXB13* T, *CIP2A* T and dual T carriers as well (7.4%, 25.2%, 2.2%, respectively) compared to patients on active surveillance (5.5%, 21.7%, 1.6%, respectively). Mutation carriers of the studied variants were more likely to receive primary oncological treatment, which could be a combined effect of other characteristics.

Statistically non-significant tendency was seen regarding both *HOXB13* T carriers and the dual T carriers frequency, as it was higher in CRPC cases (8% and 2.8%, respectively) compared to non-CRPC cases (5.9% and 1.6%, respectively). No significant association was found between the *HOXB13* and *CIP2A* carrier status, neither separately nor combined, and the PSA at diagnosis, local or distant progression or death by PrCa.

***Dual carriers of HOXB13 G84E and CIP2A R229Q variants and the combined prostate cancer modality stage***

Association of the studied variants with combined PrCa modality stage created from combination of clinical variables (TNM, Gleason, PSA) according to The European Randomized study of Screening for Prostate Cancer (ERSPC) was tested (**Supplementary Table 2**). The only significant association was found with *HOXB13* T allele, which seems to protect from higher tumour stage of T3 (TSG3 group, OR 0.6; 95% CI 0.4-0.9; p=0.009), suggesting a role in local progression (**Supplementary Table 8**). However, no association was revealed with *CIP2A* T allele alone or with dual T carriers of studied variants and the TSG1-TSG5 groups.

**Supplementary Table 1.**

**Clinical characteristics of Finnish prostate cancer patients**

| **Total PrCa sample size** | **n=2738 (%)** |
| --- | --- |
| **Average age at onset (years)** | 68.1 |
| **Average age at progression (years)** | 72.3 |
| **Average age at death (years)** | 78.4 |
| **Other cancer present** | 543 (19.8) |
| **Age at diagnosis (years)** | |
| <=55, young onset | 106 (3.90) |
| >55 | 2632 (96.1) |
| **Diagnostic PSA level, ng/mL** | |
| Low, ≤20 | 2041 (74.5) |
| High, >20 | 474 (17.3) |
| Missing data | 223 (8.20) |
| **Gleason score** | |
| Low, ≤6 | 1283 (46.9) |
| High, ≥8 | 357 (13.0) |
| Intermediate, =7 | 685 (25.0) |
| Missing data | 413 (15.1) |
| **T stage** | |
| T0 | 4 (0.10) |
| T1 | 1105 (40.4) |
| T2 | 972 (35.5) |
| T3 | 443 (16.2) |
| T4 | 97 (3.50) |
| Unknown | 9 (0.30) |
| Missing data | 108 (3.90) |
| **N stage** | |
| N1 | 14 (0.5) |
| N0 | 56 (2.00) |
| Unknown | 2560 (93.5) |
| Missing data | 108 (3.95) |
| **M stage** | |
| M1 | 191 (6.98) |
| M0 | 1170 (42.7) |
| Unknown | 1269 (46.3) |
| Missing data | 108 (3.94) |
| **Progression** | **n=749 (%)** |
| PSA | 726 (96.9) |
| Local | 11 (1.50) |
| Distant | 12 (1.60) |
| **Age at progression** | **n=749 (%)** |
| <=55 | 9 (1.20) |
| >55 | 726 (96.9) |
| Missing data | 14 (1.87) |
| **Vital status** | |
| Dead | 1126 (41.1) |
| Alive | 1612 (58.9) |
| **Cause of death** | **n=1126 (%)** |
| PrCa | 297 (26.4) |
| Other reason, overall death | 829 (73.6) |
| **Primary treatment** |  |
| Prostatectomy | 27.5 (754) |
| Radiotherapy | 14.6 (399) |
| Hormonal therapy | 29.4 (805) |
| Active surveillance | 4.71 (129) |
| Brachytherapy | 3.03 (83) |
| Cystectomy | 0.44 (12) |
| Missing data | 20.3 (556) |

**Supplementary Table 2.**

**Tumour Stage Group** **(TSG) definitions**

***Combined modality staging according to ERSPC (The European Randomized study of Screening for Prostate Cancer) classification***

| ***TSG Coding*** | ***Mstage*** | ***Nstage*** | ***Tstage*** | ***PSA*** | ***Gleason*** |
| --- | --- | --- | --- | --- | --- |
| 1 | not **M1** | not **N1** | **T1 / T2 or null** | **<10** | **2 – 6** |
| 2 | not **M1** | not **N1** | **T1 / T2 or null**  **T1 / T2 or null** | **>=10 - <20**  **<20** | **2 – 6**  **7** |
| 3 | not **M1** | not **N1** | **T1 / T2 or null**  **T1 / T2 or null**  **T3** | **>=20**  **Any / Null**  **Any / Null** | **2 – 7/ Null**  **8 – 10**  **Any / Null** |
| 4 | **M1** or | **N1** or | **T4** or | **>100** | **Any / Null** |
| 5  (Not Categorized) | not **M1** | not **N1** | **Null**  **Null** | **Any**  **Null** | **Null**  **Any** |

**Supplementary Table 3.**

**Follow-up characteristics used in survival analyses of Finnish prostate cancer patients**

| **Follow-up periods** | **Median (years)** |
| --- | --- |
| Birth - Death | 77.0 |
| Diagnosis - Progression | 4.72 |
| Progression - Death | 3.98 |
| Diagnosis - Death | 6.51 |
| **Survival times** | **Death n (%)** |
| 1-5 years | 494 (43.9) |
| 5-10 years | 420 (37.3) |
| 10-15 years | 155 (13.8) |
| 15-36 years | 21 (1.87) |
| Lost in follow up | 36 (3.2) |

**Supplementary Table 4.**

**Primer sequences used in quantitative RT-PCR reactions**

| CIP2A-RT95F | TGCTTGAAGTCCTTGCTCCT |
| --- | --- |
| CIP2A-RT95R | GAAATTACCTCCAAGTGCCGC |
| HOXB13-RT288F | GAGTACCCCAGCCGCCCCACT |
| HOXB13-RT288R | ACGAAAGGCGCAGGCGTCAGG |
| ACTB-RT188F | AGAAAATCTGGCACCACACC |
| ACTB-RT188R | AGAGGCGTACAGGGATAGCA |

**Supplementary Table 5.**

**Assessment of PrCa risk due to the combination of *HOXB13* T and *CIP2A* T in dual carriers relative to the risk in non-carriers**

| **HOXB13 and CIP2A T allele carrier status** | **Cases, n (%)** | **Controls, n (%)** | **OR (95% CI)** | **P** |
| --- | --- | --- | --- | --- |
| **HOXB13 T non-carrier & CIP2A T non-carrier** | 1893 (70.9) | 1765 (72.8) | 1.0 | |
| **HOXB13 T carrier & CIP2A T carrier** | 46 (1.70) | 2 (0.1) | **21.5 (5.20 - 88.5)** | **0.000022** |
| **HOXB13 T carrier & CIP2A T non-carrier** | 121 (4.50) | 18 (0.74) | **6.27 (3.80-10.3)** | **5.86E-13** |
| **HOXB13 T non-carrier & CIP2A T carrier** | 609 (22.8) | 638 (26.3) | 0.89 (0.78-1.01) | 0.076 |

**Supplementary Table 6**

**Time-to-PrCa event of *HOXB13* rs138213197 and *CIP2A* rs2278911**

**carriers vs. non-carriers**

| **Carriers vs. Non-Carriers** | **n** | **Mean age of diagnosis** | **HR** | **95% CI** | **P** |
| --- | --- | --- | --- | --- | --- |
| Non-HOXB13 T carriers | 2502 | **68.1** | 1.0 |  |  |
| HOXB13 T carriers | 167 | **67.8** | **1.9** | **1.6-2.2** | **6.07E-16** |
| Non-CIP2A T carriers | 2063 | 68.2 | 1.0 |  |  |
| CIP2A T carriers | 675 | 67.7 | 0.9 | 0.9-1.1 | 0.399 |
| Non-Dual carriers of HOXB13 T&CIP2A T | 2623 | **68.1** | 1.0 |  |  |
| Dual carriers of HOXB13 T&CIP2A T | 46 | **67.5** | **2.1** | **1.6-2.8** | **4.52E-7** |
| Cox regression analyses | | | | | |
| HR, hazard ratio |  |  |  |  |  |
| CI, confidence interval |  |  |  |  |  |
| Results are in bold, if the 95% CI excluded 1 and the association significant at p<0.05 vs. non-carriers | | | | | |

**Supplementary Table 7**

**Association of HOXB13 G84E and CIP2A R229Q carrier status and clinical features of prostate cancer subgroupsa**

| **Prostate cancer subgroup** | **Comparison group** | **HOXB13 T carrier** | | | | **HOXB13 T & CIP2A T carrier4** | | | | |
| --- | --- | --- | --- | --- | --- | --- | --- | --- | --- | --- |
| **F_PrCa%** | **F_C%** | **OR (95% CI)** | **P** | **F_PrCa %** | **F_C %** | **OR (CI, 95%)** | **P** | |
| **Clinically detected** | **Controls** | 6.5 | 0.8 | **8.6 (5.4-13.8)** | **3.1x10-19** | 1.8 | 0.1 | **23.4 (5.7-96.8)** | **0.000013** | |
| **Screen detected** | **Controls** | 4.2 | 0.8 | **5.2 (2.8-9.9)** | **3.4x10-7** | 0.9 | 0.1 | **10.7 (2.0-58.8)** | **0.006** | |
| **Clinically detected** | **Screen detected** | 6.5 | 4.2 | **1.6 (1.0-2.7)** | **0.046** | 1.8 | 0.9 | 2.2 (0.8-6.1) | 0.138 | |
| **BPH case1** | **BPH control2** | 6.1 | 0.5 | **12.6 (2.8-56.8)** | **0.001** | 1.0 | - | - | - | |
| **Progressed case3** | **Non-progressed case** | 6.4 | 6.0 | 1.1 (0.8-1.5) | 0.685 | 2.0 | 1.6 | 1.3 (0.7-2.4) | 0.424 | |
| **CRPC case** | **All other cases** | 8.0 | 5.9 | 1.4 (0.9-2.2) | 0.156 | 2.8 | 1.6 | 1.8 (0.8-3.9) | 0.130 | |
| **PrCa specific death** | **Alive cases** | 5.1 | 2.9 | 0.82 (0.5-1.4) | 0.493 | 1.9 | 0.8 | 1.0 (0.4-2.5) | 0.933 | |
| **PrCa specific death** | **Non-PrCa specific death** | 5.1 | 5.6 | 0.7 (0.4-1.3) | 0.316 | 1.9 | 1.2 | 1.1 (0.4-3.0) | 0.907 | |
| asummary of statistically significant associations  Case-control and case-case binary logistic regression analyses |  |  |  |  |  |  |  |  |  | |
| F_PrCa, carrier frequency in PrCa subgroup | | | | | | | | | |
| F_C, carrier frequency in comparison group | | | | | | | | | |
| BPH, Benign Prostatic Hyperplasia | | | | | | | | | |
| 1BPH case, patients with BPH with a later diagnosis of prostate cancer | | | | | | | | | |
| 2BPH control, patients with BPH with no diagnosis of prostate cancer | | | | | | | | | |
| 3Generally progressed case (either PSA or local or distant) | | | | | | | | | |
| CRPC, Castration Resistant Prostate Cancer | | | | | | | | | |
| Results are in bold, if the 95% CI excluded 1 and the association significant at p<0.05 vs. unaffected | | | | | | | | | |
| 4Dual T carriers OR for BPH case vs BPH control genotype could not be calculated because of the limitations of logistic regression method | | | | | | | | | |
|  | | | | | | | | | |

**Supplementary Table 8.**

**Association of HOXB13 and CIP2A carrier status and combined modality stage of prostate cancer patients according to ERSPC1**

| **Tumour Stage Group** | **HOXB13 T carriers*** | | | | **CIP2A T carriers** | | | | **HOXB13 T&CIP2A T carriers** | | | |
| --- | --- | --- | --- | --- | --- | --- | --- | --- | --- | --- | --- | --- |
| T carrier % (n) | T non-carrier % (n) | OR (95% CI) | P value | T carrier % (n) | T non-carrier % (n) | OR (95% CI) | P value | Dual T carrier % (n) | Dual T non-carrier % (n) | OR (95% CI) | P value |
| **TSG 1** | 4.8 (42) | 95.2 (831) | 1.0 |  | 27.1 (243) | 72.9 (654) | 1.0 |  | 1.6 (14) | 98.4 (859) | 1.0 |  |
| **TSG 2** | 6.3 (41) | 93.7 (606) | 0.8 (0.5-1.2) | 0.197 | 23.0 (153) | 77.0 (511) | 1.2 (0.9-1.6) | 0.069 | 1.1 (7) | 98.9 (640) | 1.5 (0.6-3.7) | 0.392 |
| **TSG 3** | 8.1 (51) | 91.9 (575) | **0.6 (0.4-0.9)** | **0.009** | 22.7 (146) | 77.3 (496) | 1.3 (0.9-1.6) | 0.053 | 2.7 (17) | 97.3 (609) | 0.6 (0.3-1.2) | 0.140 |
| **TSG 4** | 6.3 (17) | 93.7 (252) | 0.8 (0.4-1.3) | 0.330 | 26.6 (74) | 73.4 (204) | 1.0 (0.8-1.4) | 0.877 | 2.2 (6) | 97.8 (263) | 0.7 (0.3-1.9) | 0.495 |
| **TSG 5** | 6.3 (16) | 93.7 (238) | 0.8 (0.4-1.4) | 0.346 | 23.0 (59) | 77.0 (198) | 1.3 (0.9-1.7) | 0.184 | 0.8 (2) | 99.2 (252) | 2.1 (0.5-9.1) | 0.343 |
| Case-case multinomial logistic regression analyses | | | | | | | | | | | | |
| 1The European Randomized study of Screening for Prostate Cancer | | | | | | | | | | | | |
| *HOXB13 genotypes for n=2669 patients were available | | | | | | | | | | | | |
| TSG, Tumour Stage Group, combined modality staging in ERSPC classification (See Supplemental Table 2.) | | | | | | | | | | | | |
| OR, odds ratio | | | | | | | | | | | | |
| CI, confidence interval | | | | | | | | | | | | |
| Results are in bold if the 95% CI excluded 1 and the association was significant at p<0.05 vs. non-carriers (bold) | | | | | | | | | | | | |

**Supplementary Table 9. P-values for Figure1, Figure 2 and Supplementary figure 2.**

| **P-value of Figure 1B** |  |  |  |
| --- | --- | --- | --- |
| **Day** | **2** | **4** | **6** |
| Lenti-control vs Lenti-HOXB13 | 0,0923 | 0,0093 | 0,0208 |
| Lenti-control vs Lenti-HOXB13 G84E | 0,0006 | 0,0000 | 0,0241 |
| Lenti-HOXB13 vs Lenti-HOXB13 G84E | 0,0007 | 0,0001 | 0,0066 |
| Lenti-control vs Lenti-CIP2A | 0,0015 | 0,0055 | 0,0736 |
| Lenti-control vs Lenti-CIP2A R229Q | 0,0003 | 0,0008 | 0,1104 |
| Lenti-CIP2A vs Lenti-CIP2A R229Q | 0,0034 | 0,0036 | 0,6853 |
| Lenti-control+empty vector vs Lenti-CIP2A+ V5-HOXB13 | 0,2342 | 0,9329 | 0,7547 |
| Lenti-control+empty vector vs Lenti-CIP2A R229Q + V5HOXB13 G84E | 0,1862 | 0,0010 | 0,0014 |
| Lenti-CIP2A+ V5-HOXB13 vs Lenti-CIP2A R229Q + V5HOXB13 G84E | 0,0891 | 0,0006 | 0,0115 |
| **P-value of Figure 1D** |  |  |  |
| **Day** | **2** | **4** | **6** |
| Lenti-control vs Lenti-HOXB13 | 0,3894 | 0,0768 | 0,0190 |
| Lenti-control vs Lenti-HOXB13 G84E | 0,0167 | 0,7261 | 0,2933 |
| Lenti-HOXB13 vs Lenti-HOXB13 G84E | 0,0089 | 0,0233 | 0,0032 |
| Lenti-control vs Lenti-CIP2A | 0,0058 | 0,6158 | 0,0183 |
| Lenti-control vs Lenti-CIP2A R229Q | 0,5034 | 0,0756 | 0,0142 |
| Lenti-CIP2A vs Lenti-CIP2A R229Q | 0,0015 | 0,1096 | 0,8010 |
| Lenti-control+empty vector vs Lenti-CIP2A+ V5-HOXB13 | 0,6069 | 0,2587 | 0,0587 |
| Lenti-control+empty vector vs Lenti-CIP2A R229Q + V5HOXB13 G84E | 0,2132 | 0,0050 | 0,0003 |
| Lenti-CIP2A+ V5-HOXB13 vs Lenti-CIP2A R229Q + V5HOXB13 G84E | 0,4069 | 0,0034 | 0,0002 |
| **P-value of Figure 1F** |  |  |  |
| **Day** | **2** | **4** | **6** |
| Lenti-control vs Lenti-HOXB13 | 0,0034 | 0,0324 | 0,6954 |
| Lenti-control vs Lenti-HOXB13 G84E | 0,0007 | 0,0000 | 0,0000 |
| Lenti-HOXB13 vs Lenti-HOXB13 G84E | 0,0001 | 0,0000 | 0,0000 |
| Lenti-control vs Lenti-CIP2A | 0,0181 | 0,0007 | 0,1134 |
| Lenti-control vs Lenti-CIP2A R229Q | 0,0655 | 0,0275 | 0,7878 |
| Lenti-CIP2A vs Lenti-CIP2A R229Q | 0,0096 | 0,0001 | 0,1023 |
| Lenti-control+empty vector vs Lenti-CIP2A+ V5-HOXB13 | 0,7256 | 0,5409 | 0,0887 |
| Lenti-control+empty vector vs Lenti-CIP2A R229Q + V5HOXB13 G84E | 0,0045 | 0,0001 | 0,0022 |
| Lenti-CIP2A+ V5-HOXB13 vs Lenti-CIP2A R229Q + V5HOXB13 G84E | 0,0014 | 0,0003 | 0,0004 |
| **P-value of Figure 2 RWPE1** |  |  |  |
| **Hour** | **2** | **4** | **6** |
| Lenti-control vs Lenti-HOXB13 | 0,0004 | 0,0034 | 0,0034 |
| Lenti-control vs Lenti-HOXB13 G84E | 0,5107 | 0,5718 | 0,4361 |
| Lenti-HOXB13 vs Lenti-HOXB13 G84E | 0,1484 | 0,0553 | 0,0054 |
| Lenti-control vs Lenti-CIP2A | 0,0001 | 0,0027 | 0,0026 |
| Lenti-control vs Lenti-CIP2A R229Q | 0,0002 | 0,0019 | 0,0009 |
| Lenti-CIP2A vs Lenti-CIP2A R229Q | 0,0816 | 0,6214 | 0,1090 |
| Lenti-control+empty vector vs Lenti-CIP2A+ V5-HOXB13 | 0,7172 | 0,9187 | 0,4080 |
| Lenti-control+empty vector vs Lenti-CIP2A R229Q + V5HOXB13 G84E | 0,2722 | 0,0414 | 0,0094 |
| Lenti-CIP2A+ V5-HOXB13 vs Lenti-CIP2A R229Q + V5HOXB13 G84E | 0,2661 | 0,0513 | 0,0057 |
| **P-value of Supplementary Figure 2 22Rv1** |  |  |  |
| **Day** | **1** | **2** | **3** |
| Lenti-control vs Lenti-HOXB13 | 0,5410 | 0,8040 | 0,6707 |
| Lenti-control vs Lenti-HOXB13 G84E | 0,2222 | 0,0404 | 0,4769 |
| Lenti-HOXB13 vs Lenti-HOXB13 G84E | 0,6482 | 0,1323 | 0,2807 |
| Lenti-control vs Lenti-CIP2A | 0,8538 | 0,3882 | 0,2560 |
| Lenti-control vs Lenti-CIP2A R229Q | 0,0890 | 0,0224 | 0,2817 |
| Lenti-CIP2A vs Lenti-CIP2A R229Q | 0,9030 | 0,8744 | 0,5087 |
| Lenti-control+empty vector vs Lenti-CIP2A+ V5-HOXB13 | 0,2322 | 0,0695 | 0,0459 |
| Lenti-control+empty vector vs Lenti-CIP2A R229Q + V5HOXB13 G84E | 0,1754 | 0,0277 | 0,0004 |
| Lenti-CIP2A+ V5-HOXB13 vs Lenti-CIP2A R229Q + V5HOXB13 G84E | 0,0257 | 0,0025 | 0,0000 |

**Supplementary figure 1***.* **Higher mRNA expression pattern of *HOXB13*-*CIP2A* correlated with increased risk of prostate cancer biochemical recurrence.**

*
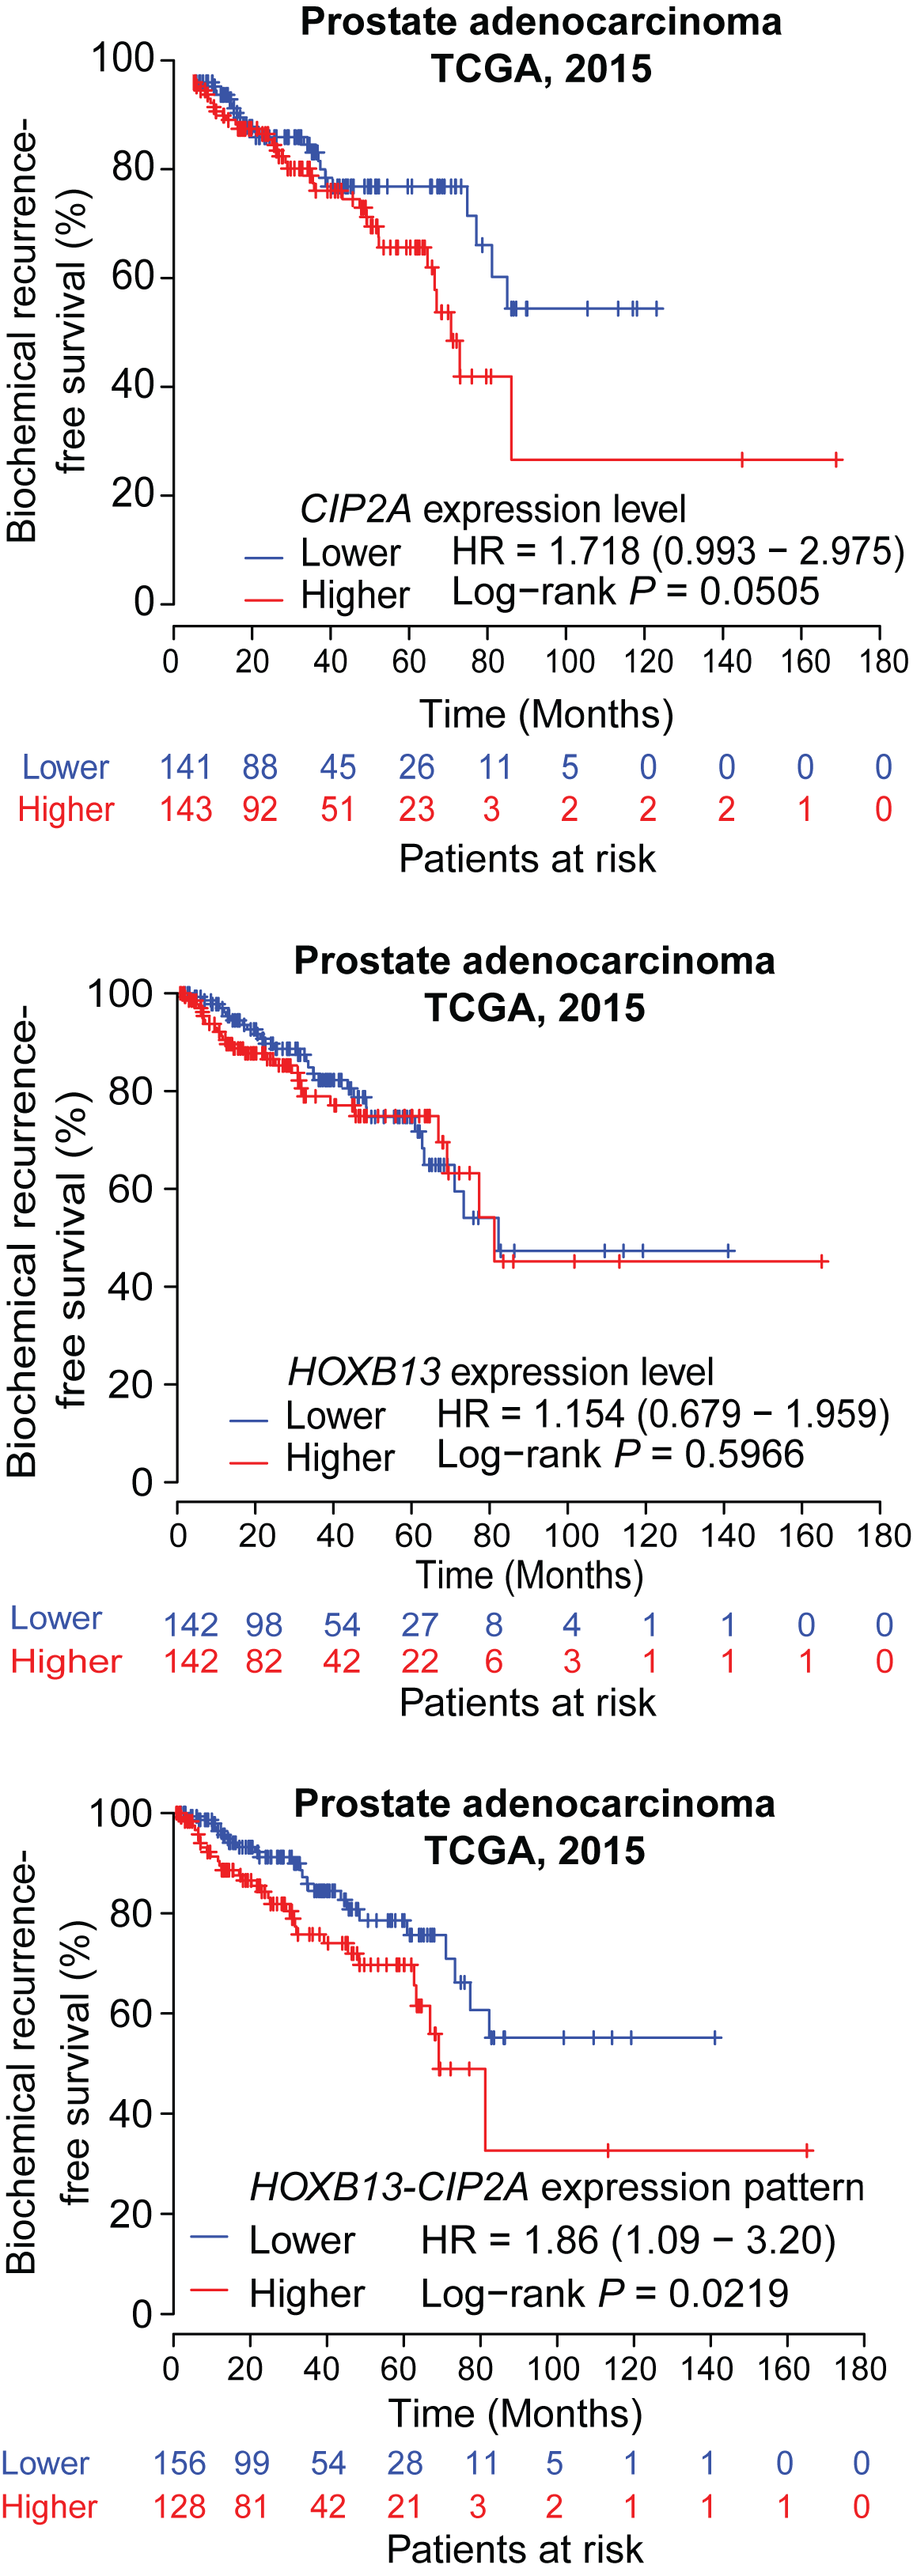
*

**Supplementary figure 2. Effects of HOXB13 G84E and CIP2A R229Q variants on prostate cell migration.**


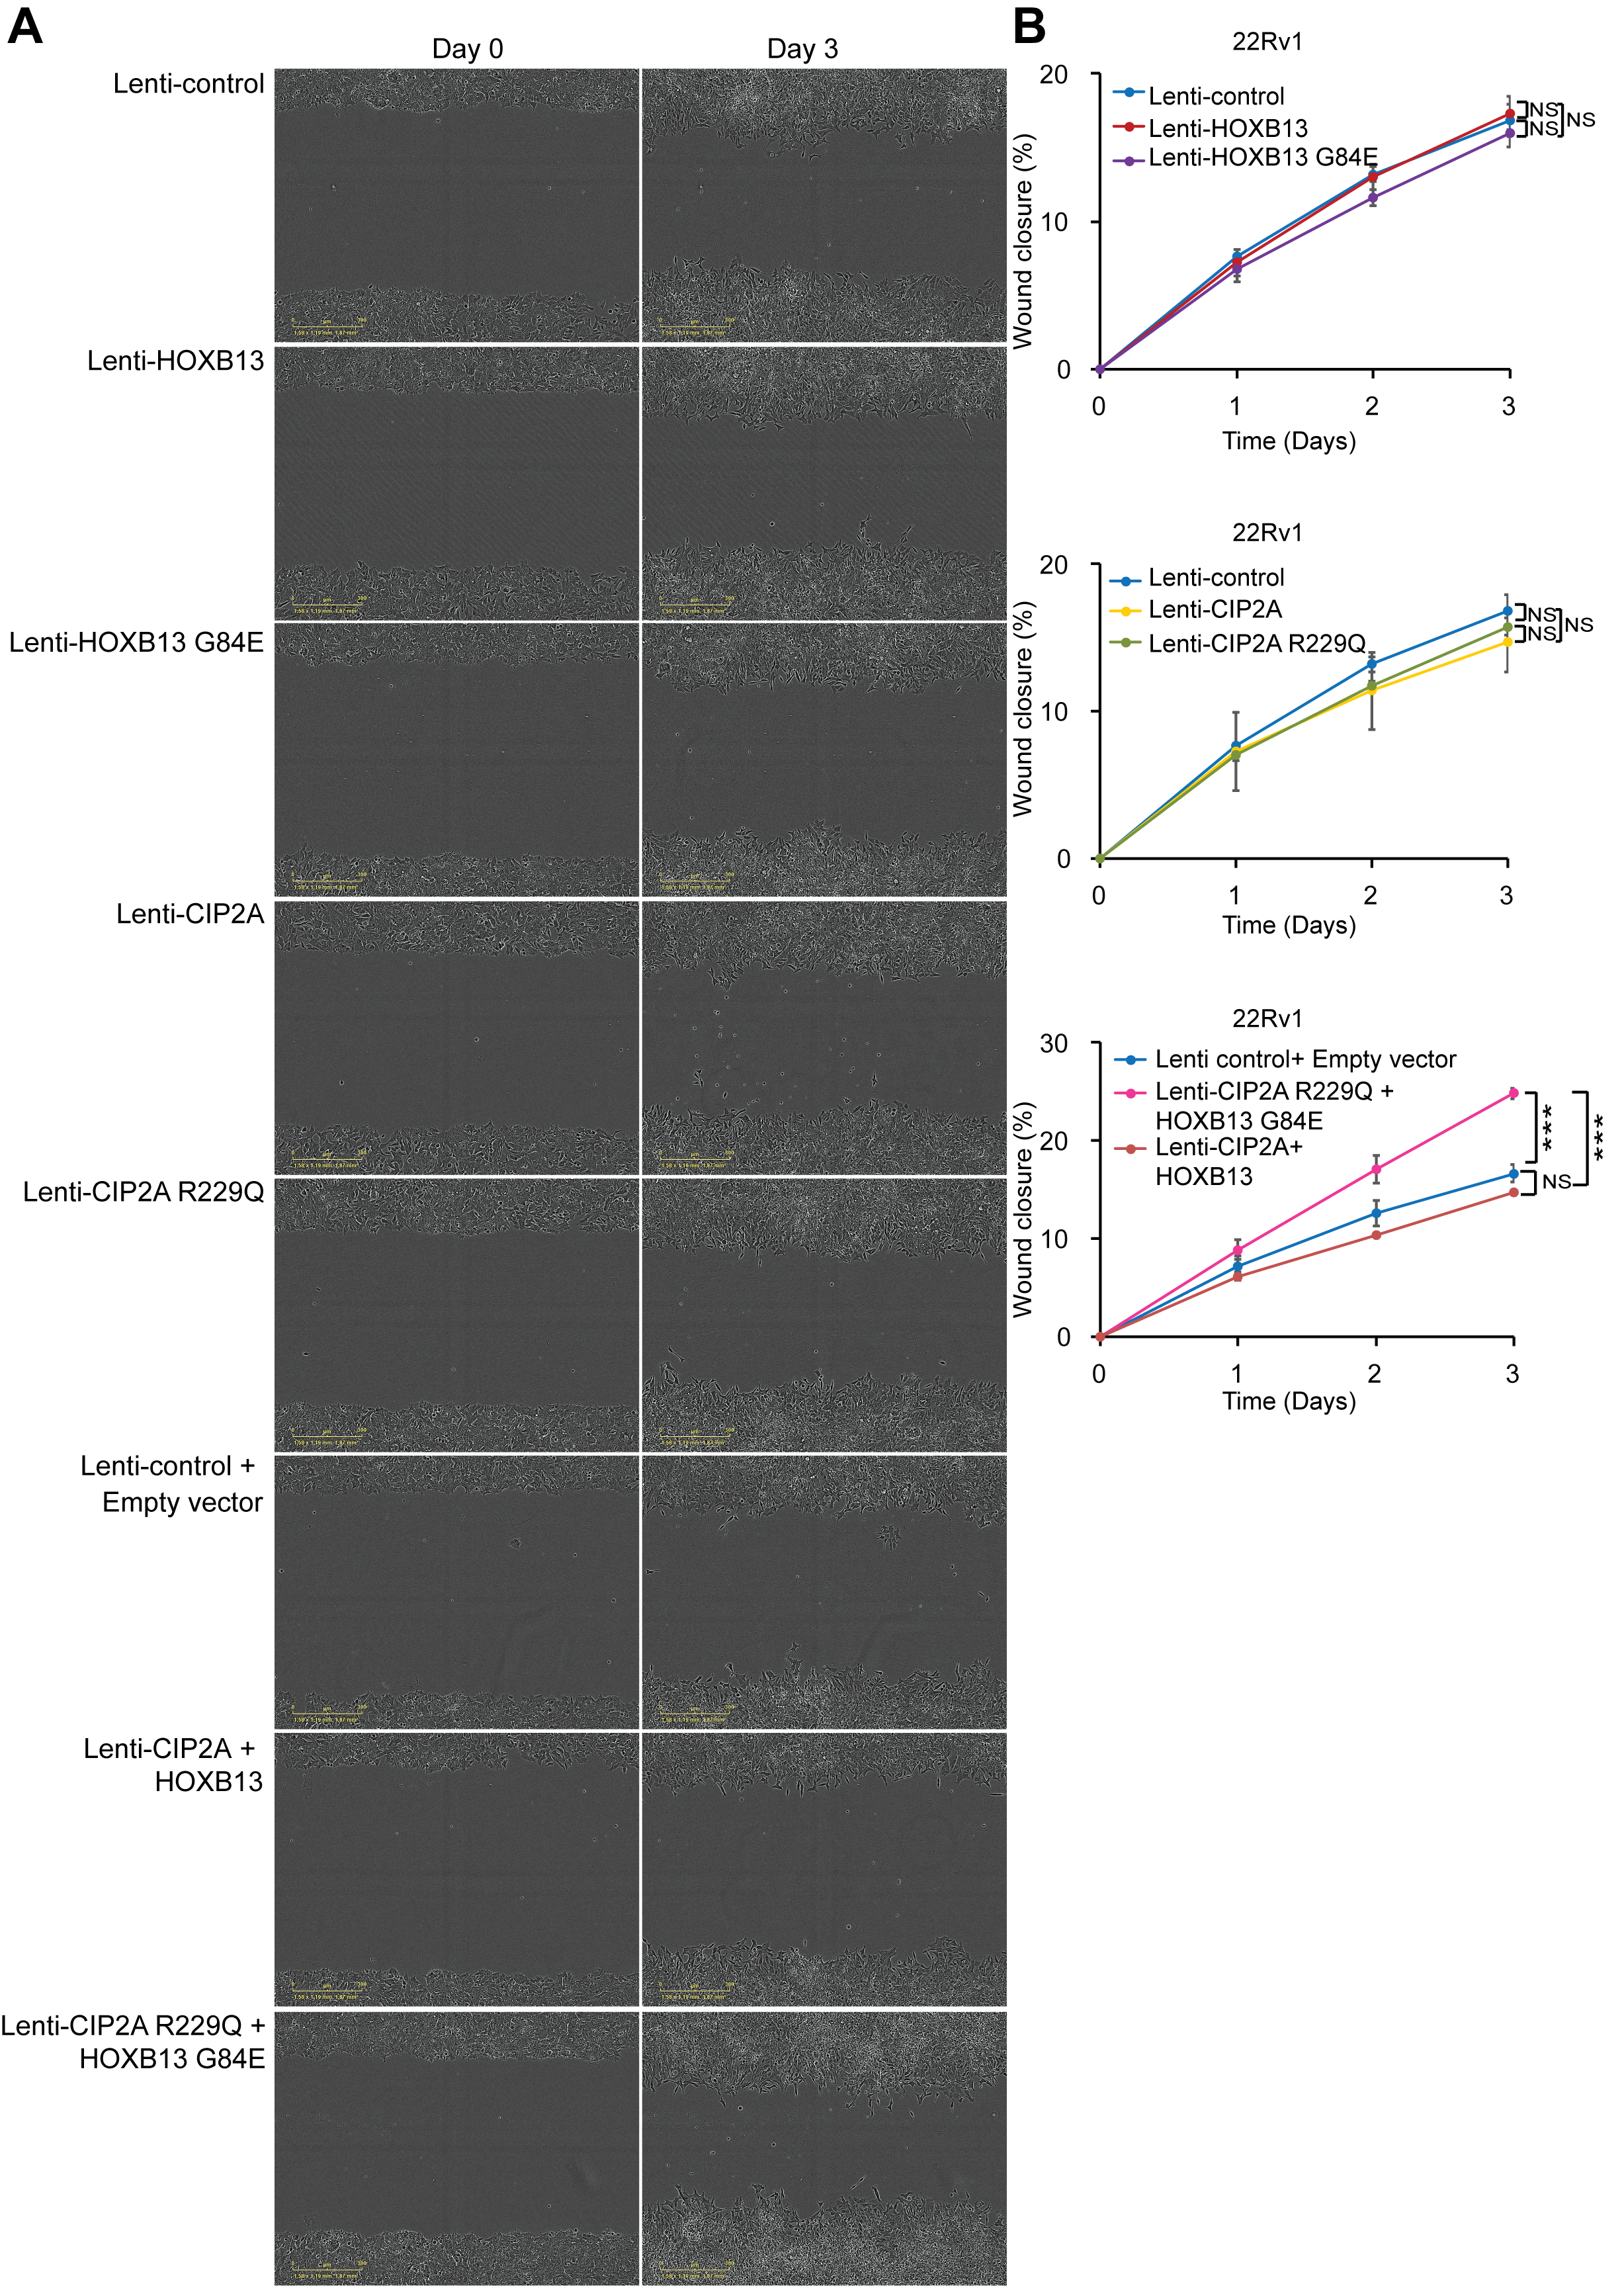


**Supplementary figure 3. ChIP-qPCR in VCaP cell line**


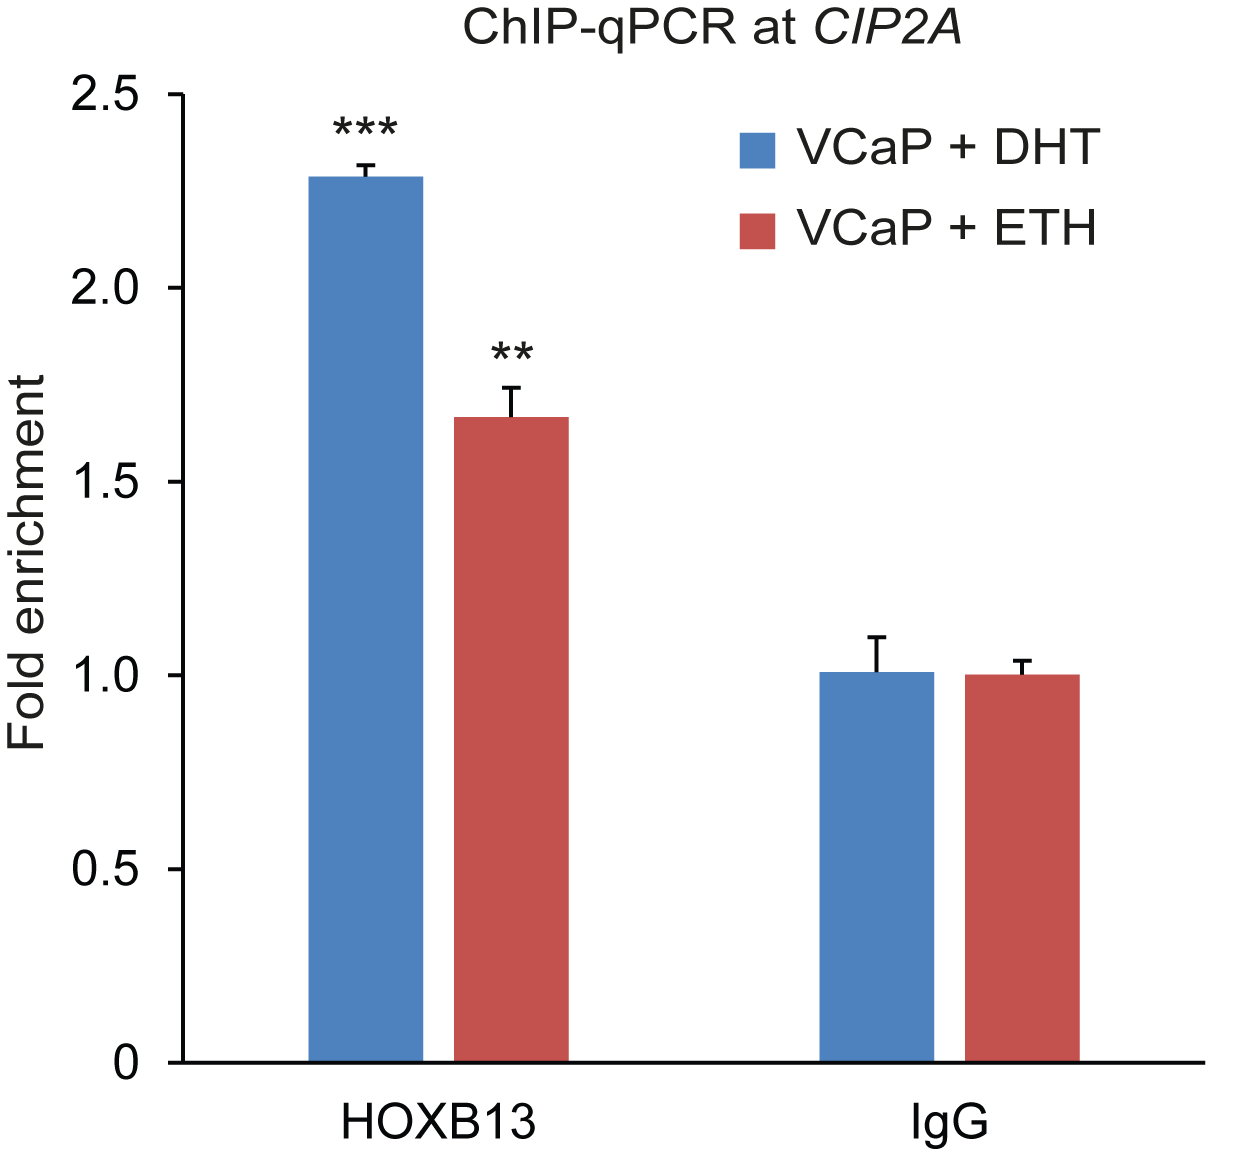


ETH, ethanol-treated; DHT, dihydrotestosterone-treated;

Error bars, s.e.m. ** p < 0.001; *** p < 0.0001, two-tailed student t-test

**Supplementary figure 4. Overexpression of HOXB13 G84E and CIP2A R229Q variants promotes cell proliferation.**


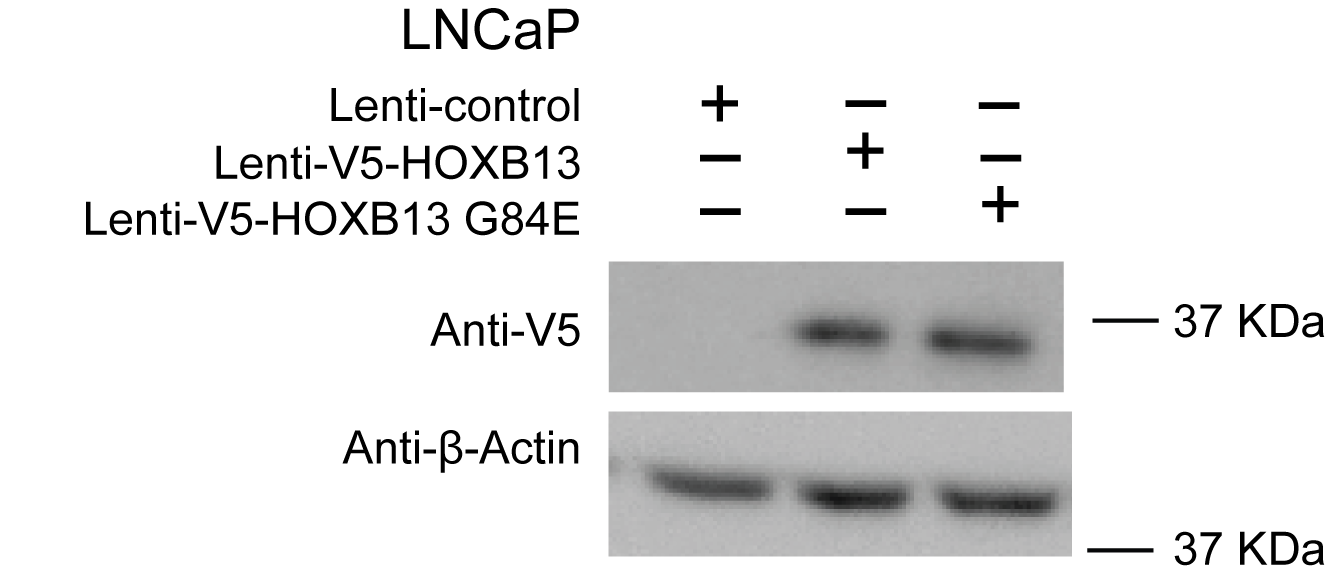


**References**

1. Kircher M, Witten DM, Jain P, O'Roak BJ, Cooper GM, Shendure J. A general framework for estimating the relative pathogenicity of human genetic variants. Nat Genet **2014**;46(3):310-5 doi 10.1038/ng.2892.

2. Huang Q, Whitington T, Gao P, Lindberg JF, Yang Y, Sun J*, et al.* A prostate cancer susceptibility allele at 6q22 increases RFX6 expression by modulating HOXB13 chromatin binding. Nat Genet **2014**;46(2):126-35 doi 10.1038/ng.2862.

3. Kim D, Pertea G, Trapnell C, Pimentel H, Kelley R, Salzberg SL. TopHat2: accurate alignment of transcriptomes in the presence of insertions, deletions and gene fusions. Genome Biol **2013**;14(4):R36 doi 10.1186/gb-2013-14-4-r36.

4. Anders S, Pyl PT, Huber W. HTSeq--a Python framework to work with high-throughput sequencing data. Bioinformatics **2015**;31(2):166-9 doi 10.1093/bioinformatics/btu638.

5. Anders S, Huber W. Differential expression analysis for sequence count data. Genome Biol **2010**;11(10):R106 doi 10.1186/gb-2010-11-10-r106.
